# Supplementary material
Source: HighWire-hosted journal article supplement (https://www.cmaj.ca/highwire/filestream/74405/field_highwire_adjunct_files/0/190591-com-1-at.pdf)
Supplement: 190591-com-1-at.pdf [file 190591-com-1-at.pdf]

## Appendix 1 (as submitted by the authors): Emergency Strategic Clinical Network Publications and Projects

### ESCN Leader Authored Publications (22)

(Publications for the ESCN as opposed to publications primarily authored through other roles)

1. Berg L, **McLane P**, Eshkakogan N, et al. Voices on indigenous cultural competency and safety in Canadian hospital emergency departments. *Int Emerg Nurs* 2019;43:133-40.
2. Klil-Drori AJ, Prajapati D, Liang Z, Wang M, Toupin D, Alothman L, **Lang E**, et al. External validation of ASPECT (Algorithm for Suspected Pulmonary Embolism Confirmation and Treatment). *Med Care* 2019. doi:10.1097/MLR.0000000000001055. [Epub ahead of print].
3. Sinclair A, Peprah K, Quay T, McInnis M, **Lang E**, et al. Optimal strategies for the diagnosis of acute pulmonary embolism: a health technology assessment [internet]. *CADTH Technol Overv* 2018.
4. Lim W, Le Gal G, Bates SM, , Righini M, Haramati LB, **Lang E**, et al. American Society of Hematology 2018 guidelines for management of venous thromboembolism: diagnosis of venous thromboembolism. *Blood Adv* 2018;2:3226-56.
5. Hiranandani R, Mackenzie MJ, Wang D, Fung T, **Lang E** et al. Emergency physicians choose wisely when ordering plain radiographs for low back pain patients. *Cureus* 2018;10:e3126.
6. Atkinson P, **Lang E**, Mackenzie M, et al. CJEM Debate Series: #ChoosingWisely - The choosing wisely campaign will not impact physician behaviour and choices. *CJEM* 2018;20:170-5.
7. Senior K, Burles K, Wang D, Grigat D, Innes GD, Andruchow JE, **Lang E**, et al. Age-adjusted D-dimer thresholds in the investigation of suspected pulmonary embolism: a retrospective evaluation in patients ages 50 and older using administrative data. *CJEM* 2018;20:725-31.
8. de Wit K, Curran J, Thoma B, Dowling S, **Lang E**, et al. Review of implementation strategies to change healthcare provider behaviour in the emergency department. *CJEM* 2018;20:453-60.
9. Cummings G, **McLane P**, Reid C, et al. Fractured care: A window into emergency transitions in care for long term care residents with complex health needs. *J Aging Health* 2018. doi: 10.1177/0898264318808908. [Epub ahead of print].

10. Tate K, Hewko S, **McLane P**, et al. Learning to lead: A review and synthesis of literature examining health care managers' use of knowledge. *J Health Serv Res Policy* 2018;24:57-70.
11. Arrotta N, Hill J, Villa-Roel C, Dennett E, **Rowe BH**. Factors associated with hospital admission in adult patients with asthma exacerbations: A systematic review. *J Asthma* 2018. doi:10.1080/02770903.2018.1424189.
12. Ospina MB, Michas M, Duecher L, Leigh R, Bhutani M, **Rowe BH**, et al. Development of a patient centered, evidence and consensus based discharge care bundle for chronic obstructive pulmonary disease. *BMJ Open Respir Res* 2018;5:e000265.
13. Moe J, Camargo CA Jr, Jelinski S, Erdelyi S, Brubacher J, **Rowe BH**. Epidemiologic trends in substance and opioid misuse-related emergency department visits in Alberta: A cross-sectional time-series analysis. *Can J Public Health* 2018;109:164-73.
14. Villa-Roel C, Ospina M, Majumdar SR, Couperthwaite S, Rawe E, Nikel T, **Rowe BH**. Engaging patients and primary care providers in the design of novel opinion leader based interventions for acute asthma in the emergency department: A mixed methods study. *BMC Health Serv Res* 2018;18:789.
15. Patrick SP, Gaudet LA, Krebs DL, Chambers T, **Rowe BH**. Emergency physician training on mild traumatic brain injury (mTBI): A systematic review. *AEM Educ Train* 2017;1-11.
16. Cave A, Sharoe H, Anselmo M, ... **Rowe BH**, et al. Primary care pathway for childhood asthma: Protocol for a randomized cluster-controlled trial. *JMIR Research Protocols* 2016;5:e37.
17. Ospina MB, Mrklas K, Deuchar L, **Rowe BH**, et al. A systematic review of the effectiveness of discharge care bundles for patients with chronic obstructive pulmonary disease. *Thorax* 2017;72:31–39. (with Editorial: Man WD-C, Barker R, Maddocks M, et al. *Thorax*. 2017; 72:8-9).
18. Cheng AHY, Campbell S, Goddard T, ... **Holroyd BR**, ... **Rowe BH** et al. Choosing Wisely Canada®: Five tests, procedures and treatments to question in Emergency Medicine. *CJEM* 2017;19:9-17.
19. Alexiu CJ, Chuck A, **Jelinski SE**, **Rowe BH**. Presentations for hypoglycemia associated with diabetes mellitus to emergency departments in a Canadian province: A database and epidemiological analysis. *Diabetes Res Clin Pract.* 2017; 130:229-236.
20. Villa-Roel C, Nikel T, **Ospina M**, Voaklander B, Campbell S, **Rowe BH**. Effectiveness of Educational Interventions to Increase Primary Care Follow-up for Adults Seen in the Emergency Department for Acute Asthma: A Systematic Review and Meta-analysis. *Acad Emerg Med.* 2016 Jan;23(1):5-13.

21. Krebs L, Kirkland SW, Villa-Roel C, ... **Rowe BH**. Emergency Department Use: Influence of connection to a family physician on ED use and attempts to avoid presentation. *Healthc Q* 2017;19:47-54.
22. Villa-Roel C, Nikel T, Ospina M, Voaklander B, Campbell S, **Rowe BH**. Effectiveness of educational interventions to increase primary care follow-up for adults seen in the emergency department for acute asthma: A systematic review and meta-analysis. *Acad Emerg Med* 2016;23:5–13.

## ESCN Funded Publications

### Summer Studentship Competition (4)

1. Desai S, Liu C, Krebs L, et al. Effectiveness of implementing evidence based interventions to reduce C-spine imaging in the emergency department: a systematic review. *Acad Emerg Med* 2018. doi: 10.1111/acem.13364. [Epub ahead of print].
2. Liu C, Desai S, Krebs L, et al. Effectiveness of implementing evidence based interventions to reduce lumbar-spine imaging in the emergency department: A systematic review. *Acad Emerg Med* 2018. doi: 10.1111/acem.13376. [Epub ahead of print].
3. Mackenzie MJ, Hiranandani R, Wang D, Fung T, Lang E. Determinants of Computed Tomography Head Scan Ordering for Patients with Low-Risk Headache in the Emergency Department. *Cureus*. 2017 9;9(10):e1760.
4. Hill J, Arrotta N, Villa-Roel, et al. Factors associated with relapse following asthma exacerbations: A systematic review. *BMJ Open Respir Res* 2017;4:e000169.

### Systematic Review Grant Competition (4, protocols excluded)

1. Tarr G, Yang C, Lorenzetti D, et al. Performance of commercial tests for molecular detection of Shiga toxin producing *Escherichia coli* (STEC): a systematic review and meta-analysis protocol. *BMJ Open* 2019;9:e025950.
2. Michaud A, Parker S, Ganshorn H, Ezekowitz J, McRae A. Prediction of Early Adverse Events in Emergency Department Patients With Acute Heart Failure: A Systematic Review. *Can J Cardio*, 2018. 34(2), 168 – 179.
3. Grisaru S, Xie J, Samuel S, Hartling L, Tarr PI, Schnadower D, Freedman SB. Associations Between Hydration Status, Intravenous Fluid Administration, and Outcomes of Patients Infected With Shiga Toxin–Producing *Escherichia coli*: A Systematic Review and Meta-analysis. *JAMA Pediatr*. 2017;171(1):68–76.

4. Gudrun Reay, Jill M. Norris, Lorelli Nowell, K. Alix Hayden, Katherine Yokom, Eddy S. Lang, Gerald C. Lazarenko & Joanna Abraham (2019): Transition in care from EMS providers to emergency department nurses: a systematic review. *Prehosp Emerg Care*, DOI: 10.1080/10903127.2019.1632999

#### **Directed Funding (4)**

1. Kirkland SW, Soleimani A, Rowe BH, et al. A systematic review examining the impact of redirecting low-acuity patients seeking emergency department care: is the juice worth the squeeze? *Emerg Med J* 2019;36:97-106.
2. Kirkland SW, Amir S, Newton M. The impact of pediatric mental health care provided outpatient, primary care, community and school settings on emergency department use – a systematic review. *Child and Adolescent Mental Health*. 2018;23(1):3-14.
3. Newton AS, Soleimani A, Kirkland SW, et al. A Systematic Review of Instruments to Identify Mental Health and Substance Use Problems Among Children in the Emergency Department. *Acad Emerg Med*. 2017;24(5):552-568.
4. Newton AS, Hartling L, Soleimani A, et al. A systematic review of management strategies for children's mental health care in the emergency department: update on evidence and recommendations for clinical practice and research. *Emerg Med J*. 2017;34(6):376-38.

#### **Scientific Director Discretionary Fund (11)**

1. Kirkland SW, Vandenberghe C, Voaklander B, et al. Combined inhaled beta-agonist and anticholinergic agents for emergency management in adults with asthma. *Cochrane Libr* 2017. doi: 10.1002/14651858.CD001284.
2. Rowe BH, Kirkland AW, Vandermeer B, et al. *Prioritizing systemic corticosteroid treatments to mitigate relapse in adults with acute asthma. A systematic review and network meta-analysis*. *Acad Emerg Med* 2017;24:371-81.
3. Moe J, Kirkland SW, Rowe E, et al. Effectiveness of interventions to decrease emergency department visits by adult frequent users: A systematic review. *Acad Emerg Med* 2017;24:40–52.
4. Krebs L, Kirkland SW, Villa-Roel C, et al. Emergency Department Use: Influence of connection to a family physician on ED use and attempts to avoid presentation. *Healthc Q*. 2017;19:47-54.

5. Krebs LD, Kirkland SW, Chetram R, et al. Low-acuity presentation to the Emergency Department in Canada: Exploring the alternative attempts to avoid presentation. *Emerg Med J* 2017;34:249-55.
6. Ospina MB, Mrklas K, Deuchar L, et al. A systematic review of the effectiveness of discharge care bundles for patients with chronic obstructive pulmonary disease. *Thorax* 2017;72:31–9. (with editorial: Man WD-C, Barker R, Maddocks M, et al. (2017). *Thorax*, 72, 8-9).
7. Arrotta N, Hill J, Villa-Roel C, et al. Factors associated with hospital admission in adult patients with asthma exacerbations: A systematic review. *J Asthma* 2018. doi:10.1080/02770903.2018.1424189.
8. Ospina MB, Michas M, Duecher L, et al. Development of a patient centered, evidence and consensus based discharge care bundle for chronic obstructive pulmonary disease. *BMJ Open Respir Res* 2018;5:e000265.
9. Moe J, Camargo CA Jr, Jelinski S, et al. Epidemiologic trends in substance and opioid misuse-related emergency department visits in Alberta: A cross-sectional time-series analysis. *Can J Public Health* 2018;109:164-73.
10. Eliyahu L, Kirkland S, Campbell S, et al. The effectiveness of early educational interventions in the Emergency Department to reduce incidence or severity of post-concussion syndrome following a concussion: A systematic review. *Acad Emerg Med* 2016;23:531–42.
11. Moe J, Kirkland S, Ospina M, et al. Mortality, admissions and outpatient outcomes of frequent users of emergency departments: A systematic review. *Emerg Med J* 2016;33:230-6.

### **ESCN Supported *Partnerships for Research and Innovation in the Health System Projects***

| SCN                                                                                            | Principle Applicant                                                           | Title                                                                                                                                          | Year |
|------------------------------------------------------------------------------------------------|-------------------------------------------------------------------------------|------------------------------------------------------------------------------------------------------------------------------------------------|------|
| Emergency;<br>Seniors                                                                          | Heather Hair<br>Emergency Strategic<br>Clinical Network™                      | Improving Acute Care for<br>Long-Term Care (LTC)<br>Residents: A Better Way<br>to Care for the Frail Elderly<br>in Times of Medical<br>Urgency | 2018 |
| Addiction &<br>Mental Health;<br>Emergency;<br>Population<br>Public &<br>Indigenous<br>Health; | Kay Rittenbach<br>Addiction & Mental<br>Health Strategic<br>Clinical Network™ | Virtual Supervised<br>Consumption: Using an<br>evidence-based approach<br>to impact more of Alberta's<br>Communities                           | 2018 |

|                                                                                                                        |                                                       |                                                                                                                                                                             |      |
|------------------------------------------------------------------------------------------------------------------------|-------------------------------------------------------|-----------------------------------------------------------------------------------------------------------------------------------------------------------------------------|------|
| Addiction & Mental Health; Emergency                                                                                   | Amanda Newton,<br>University of Alberta               | Implementing Innovative Models of Acute Pediatric Mental Health and Addiction Care                                                                                          | 2018 |
| Addiction & Mental Health; Emergency; Population Public & Indigenous Health; Primary Care & Chronic Disease Management | Fabreau, Gabriel E.<br><i>University of Calgary</i>   | Coordinated Care Team for Vulnerable Patients with Complex Care Needs                                                                                                       | 2016 |
| Emergency; Respiratory                                                                                                 | Stickland, Michael K.<br><i>University of Alberta</i> | Developing and Assessing the Effectiveness of a Post-discharge Care Pathway to Reduce Emergency Department Re-visits and Hospital Re-admission Rates for Patients with COPD | 2014 |
| Addiction & Mental Health; Emergency                                                                                   | Salvalaggio, Ginetta<br><i>University of Alberta</i>  | Enhanced Multidisciplinary Care for Inner City Patients with High Acute Care Use                                                                                            | 2014 |
| Emergency                                                                                                              | Rowe, Brian H.<br><i>University of Alberta</i>        | Development, Implementation and Evaluation of the Impact of a Choosing Wisely List of Tests and Interventions for Emergency Departments in Alberta                          | 2014 |
| Emergency                                                                                                              | Lang, Eddy S.<br><i>University of Calgary</i>         | Reassessment of Clinical Practices for Patient Presenting to the Emergency Department with Upper Gastrointestinal Bleeding                                                  | 2014 |

|           |                                               |                                                                                                     |      |
|-----------|-----------------------------------------------|-----------------------------------------------------------------------------------------------------|------|
| Emergency | Lang, Eddy S.<br><i>University of Calgary</i> | Improving the Stewardship<br>of Diagnostic Imaging<br>Resources in Alberta<br>Emergency Departments | 2013 |
|-----------|-----------------------------------------------|-----------------------------------------------------------------------------------------------------|------|
